# Supplementary material for: Design protocols in triarylamine cored dendrimer-based explosive sensors
Source: Royal Society of Chemistry journal article supplement (doi:10.1039/c2tc00541g), 2012-12-19

Supporting information:

## Design Protocols in Triarylamine Cored Dendrimer-Based Explosive Sensors

George Vamvounis, Paul E. Shaw and Paul L. Burn

Centre for Organic Photonics & Electronics, School of Chemistry and Molecular Biosciences, The University of Queensland, Brisbane, QLD, 4072, Australia

$^1\text{H-NMR}$ ,  $^{13}\text{C-NMR}$ , MALDI-MS (top: experimental, bottom: theoretical isotopic pattern), FT-IR, UV-Vis absorption spectra of Compound **1** to **7** are presented:

Dendron 1, 5

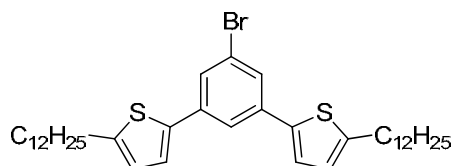

Chemical Formula: C<sub>38</sub>H<sub>57</sub>BrS<sub>2</sub>

Molecular Weight: 657.9

m/z: 658.3 (100.0%), 656.3 (86.6%), 659.3 (40.9%), 657.3 (37.5%), 660.3 (16.4%), 661.3 (4.5%), 662.3 (1.0%)

Elemental Analysis: C, 69.37; H, 8.73; Br, 12.15; S, 9.75

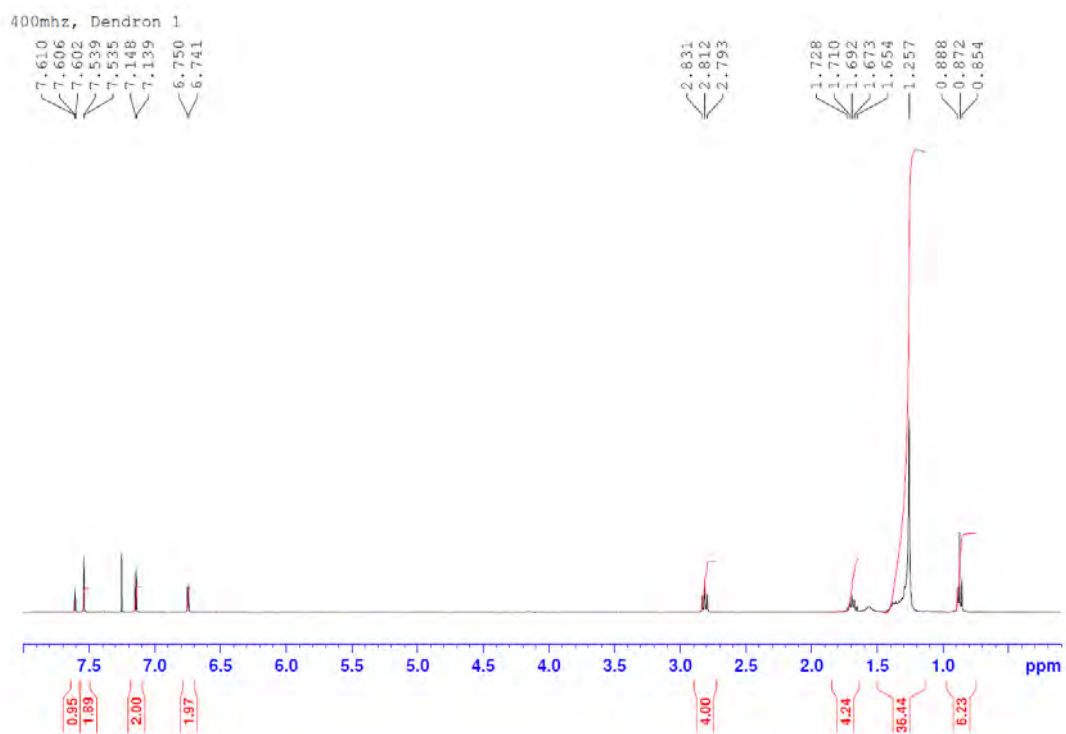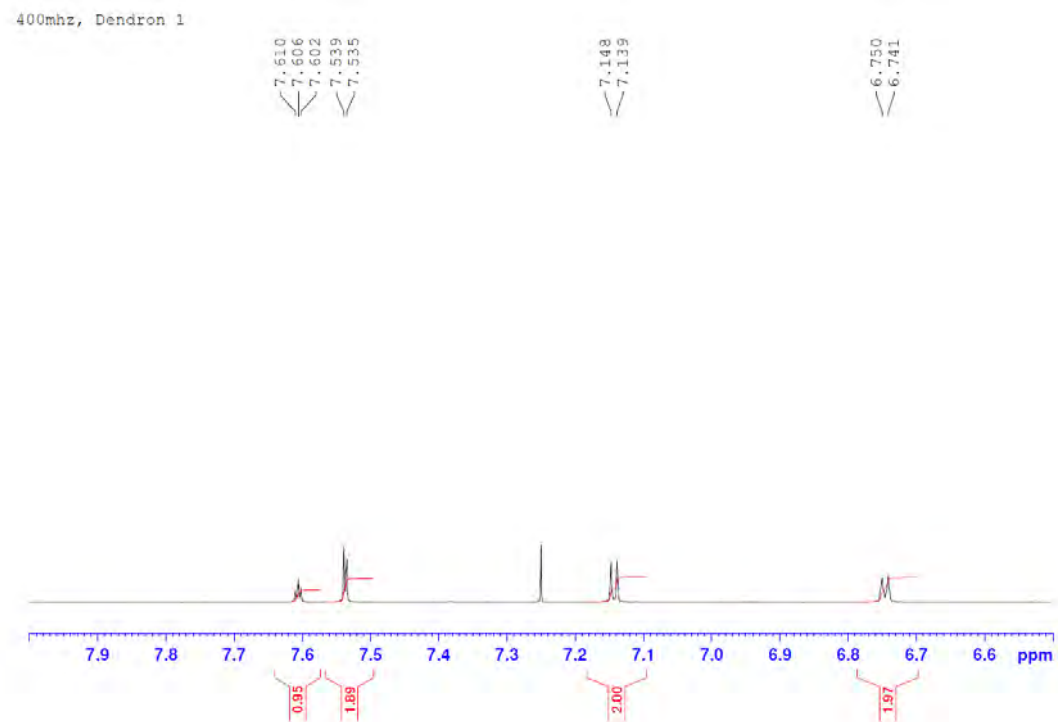

400mhz, Dendron 1

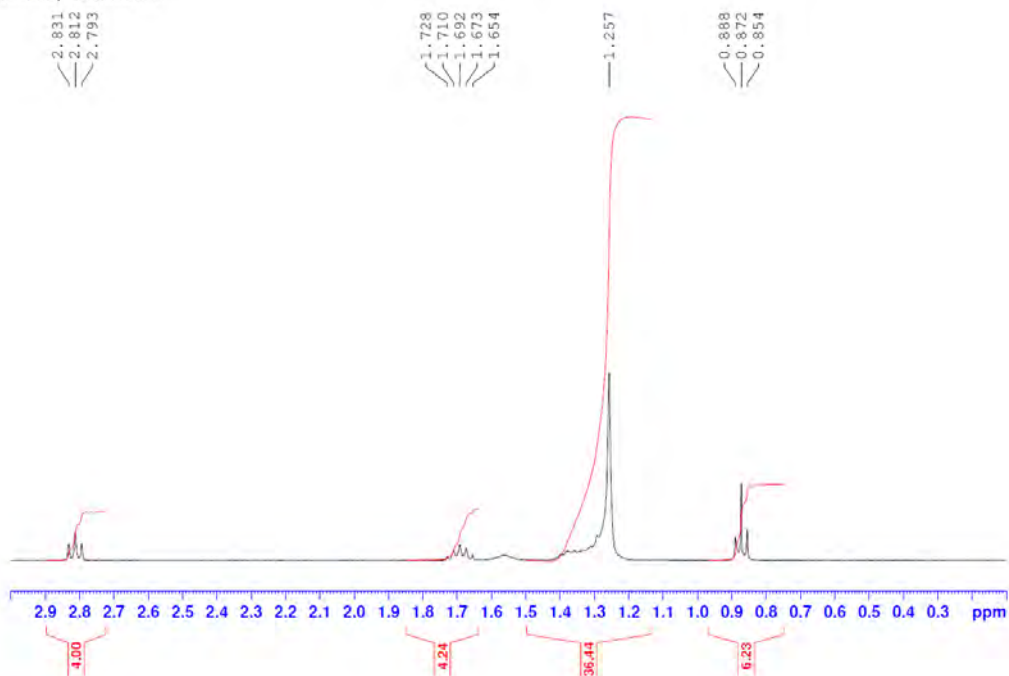

100 Mhz, Dendron 1

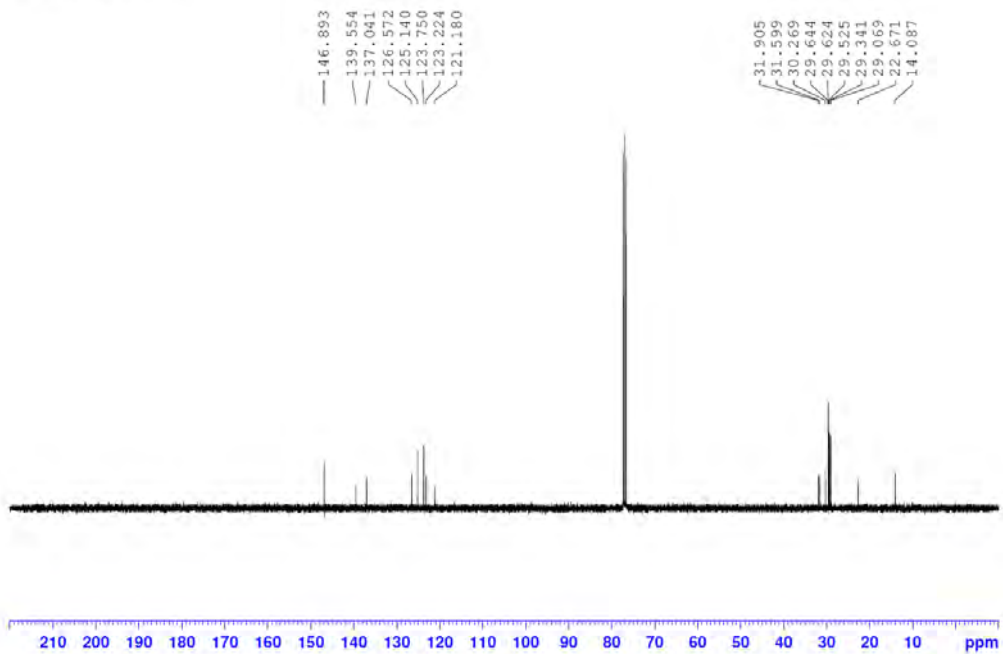

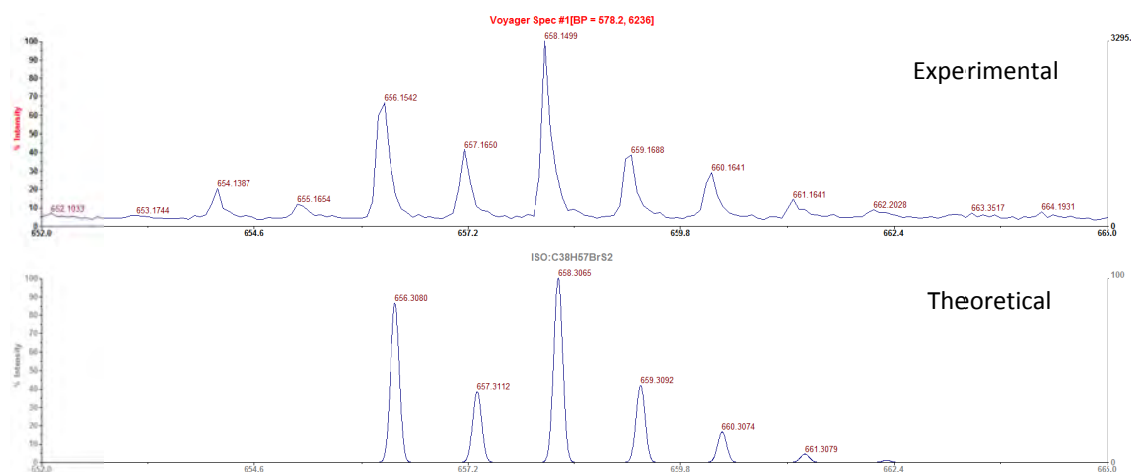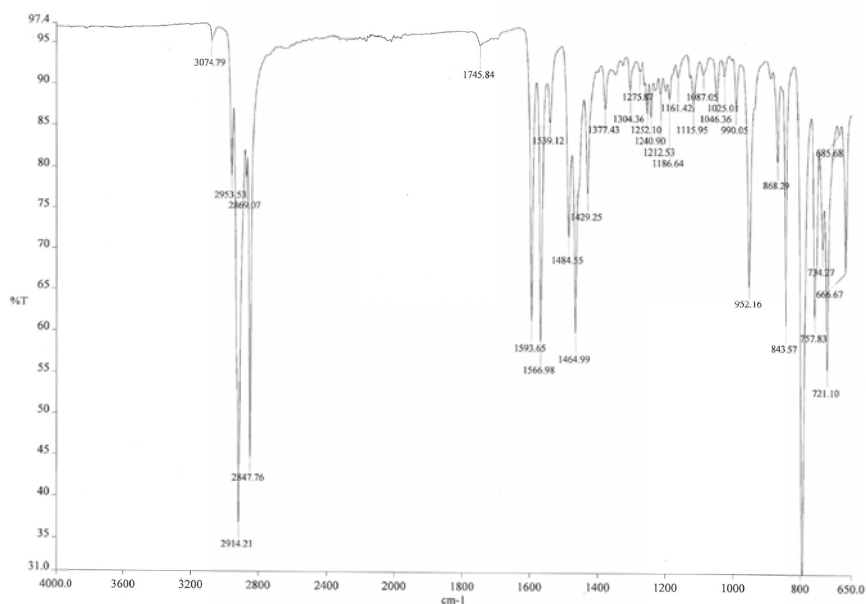

### Dendron 1

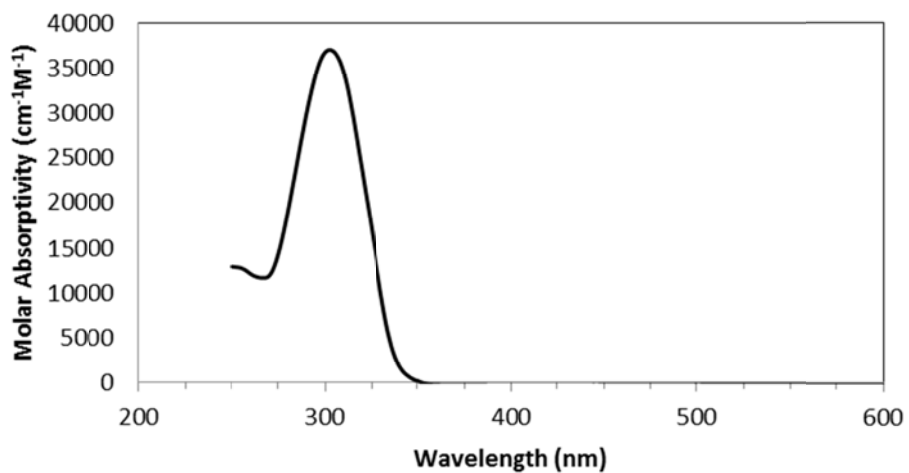

Dendron 2, **6**

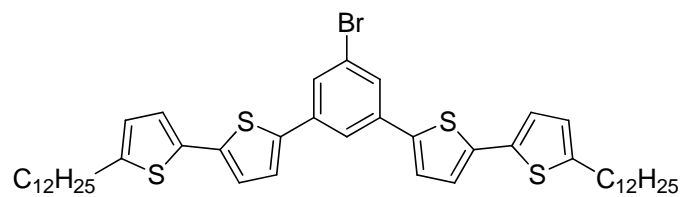

Chemical Formula: C<sub>46</sub>H<sub>61</sub>BrS<sub>4</sub>

Molecular Weight: 822.1

m/z: 822.3 (100.0%), 820.3 (77.2%), 823.3 (49.6%), 821.3 (41.4%), 824.3 (27.3%), 825.3 (9.9%), 826.3 (3.3%)

Elemental Analysis: C, 67.20; H, 7.48; Br, 9.72; S, 15.60

400mhz, Dendron 2

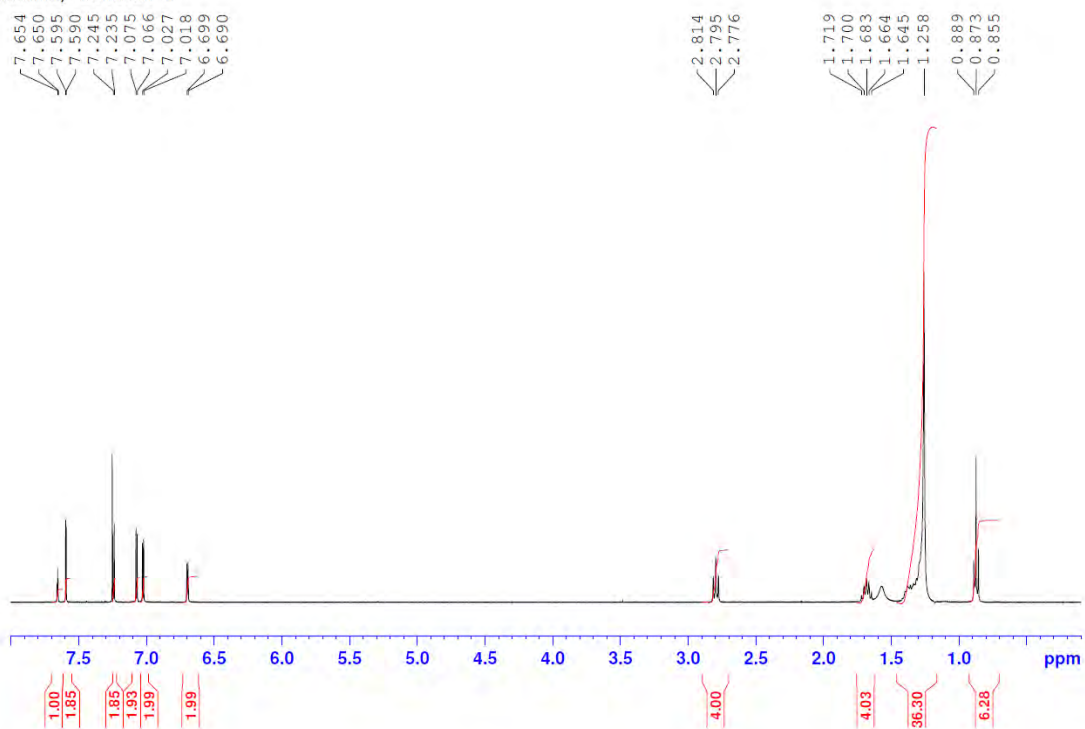

400mhz, Dendron 2

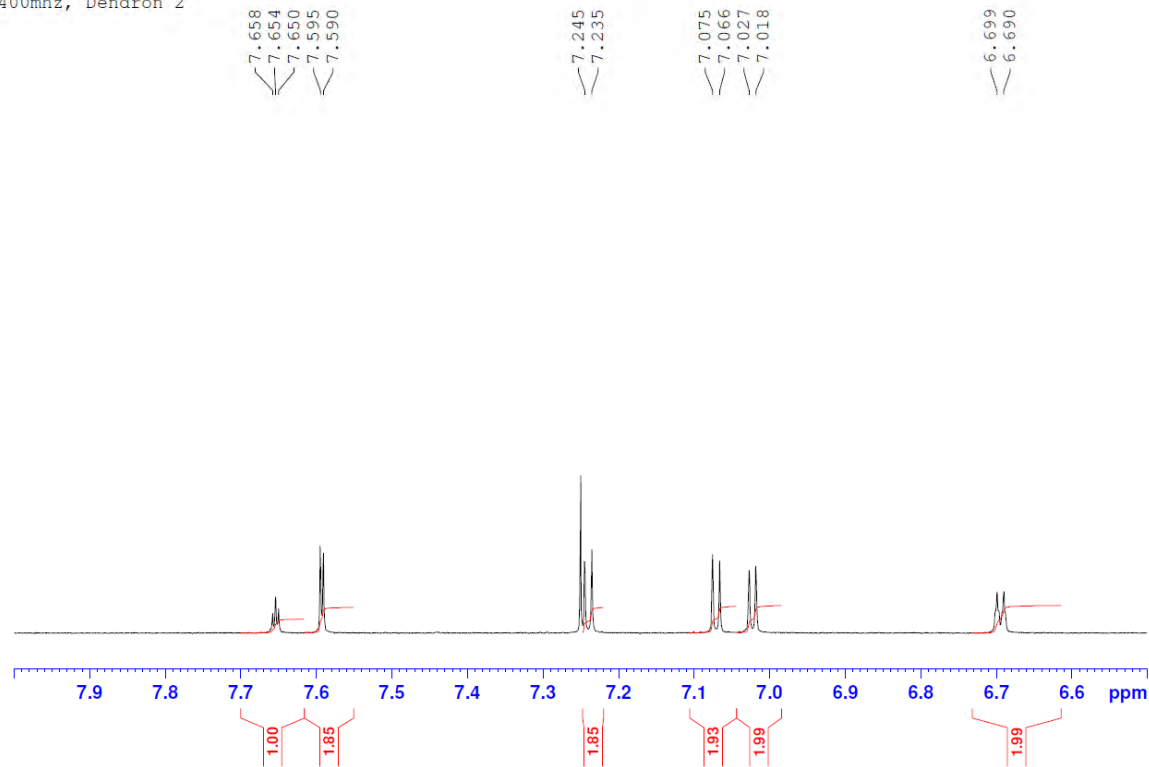

400mhz, Dendron 2

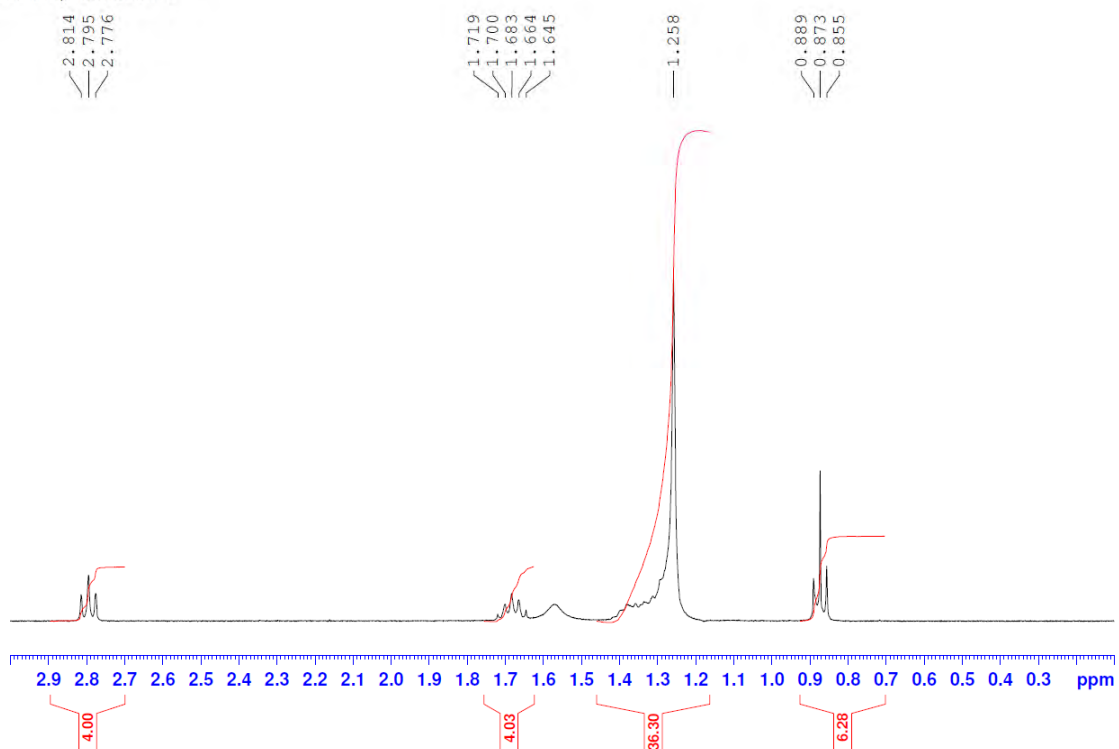

100 Mhz, Dendron 2

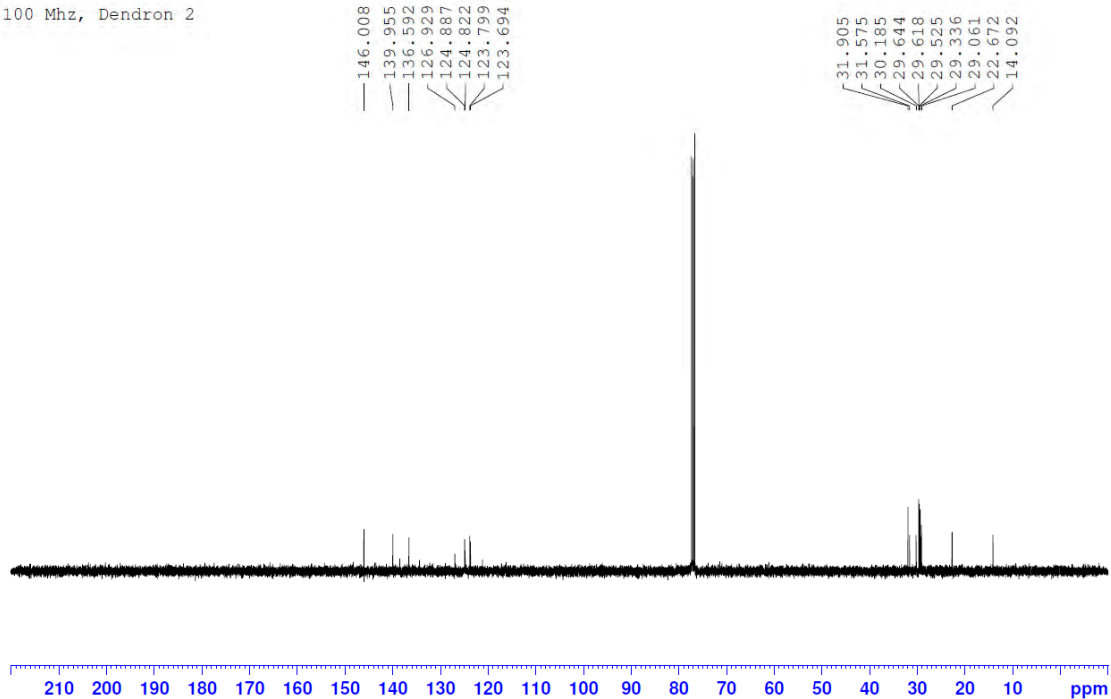



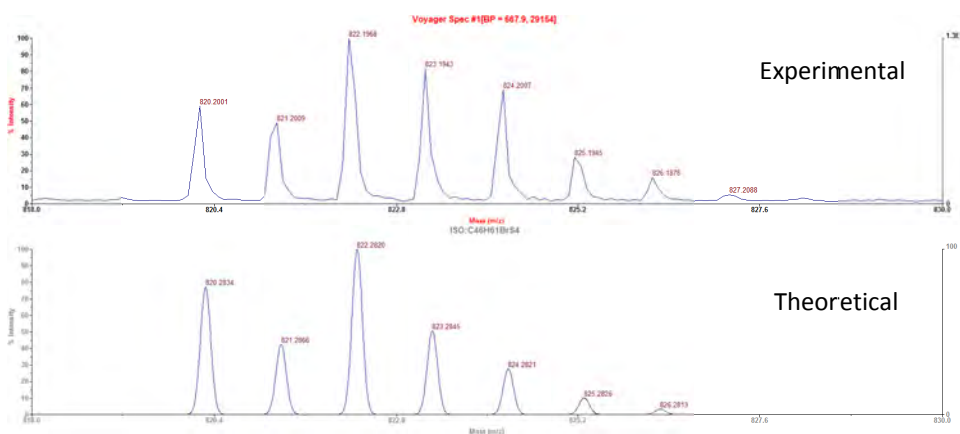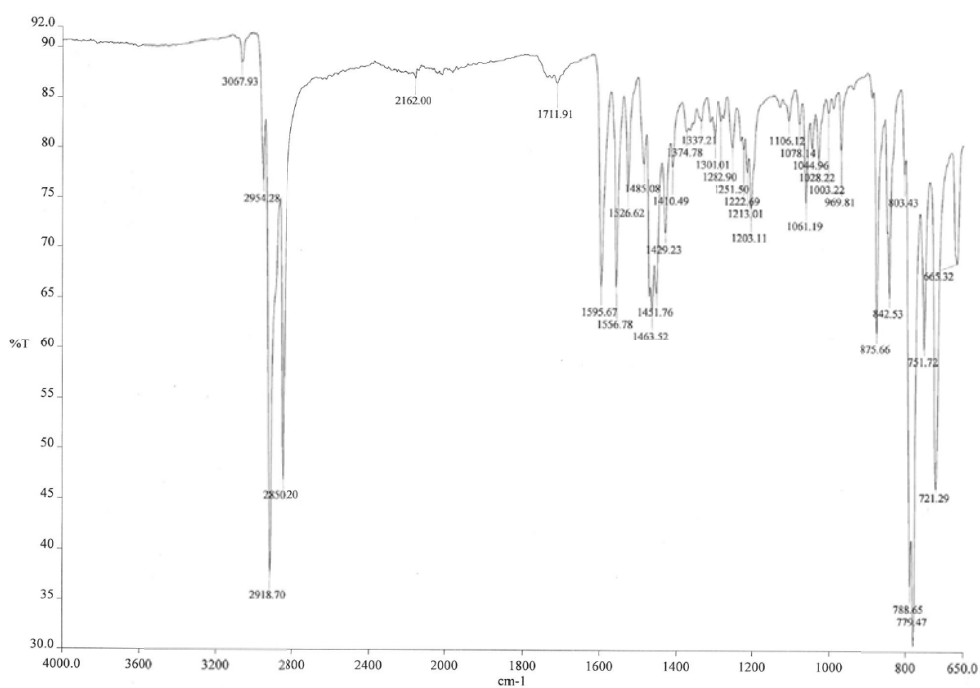

### Dendron 2

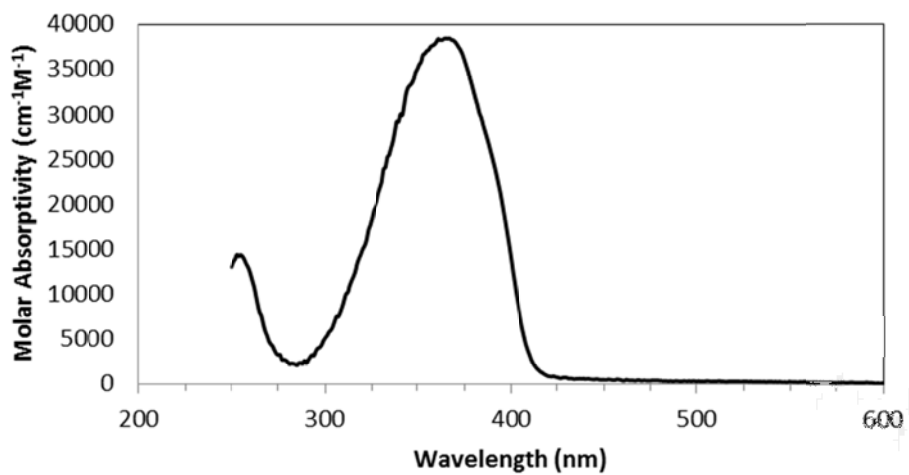

Dendrimer 1, 1

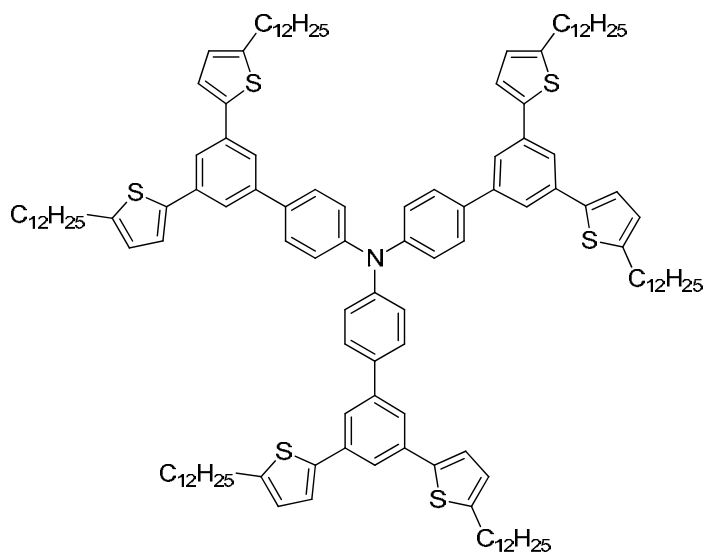

Chemical Formula:  $C_{132}H_{183}NS_6$

Molecular Weight: 1976.3

m/z: 1975.3 (100.0%), 1976.3 (92.6%), 1974.3 (66.6%), 1977.3 (63.7%), 1978.3 (35.6%), 1979.3 (16.8%), 1980.3 (6.9%), 1981.3 (2.5%)

Elemental Analysis: C, 80.22; H, 9.33; N, 0.71; S, 9.74

400mhz, Dendrimer 1

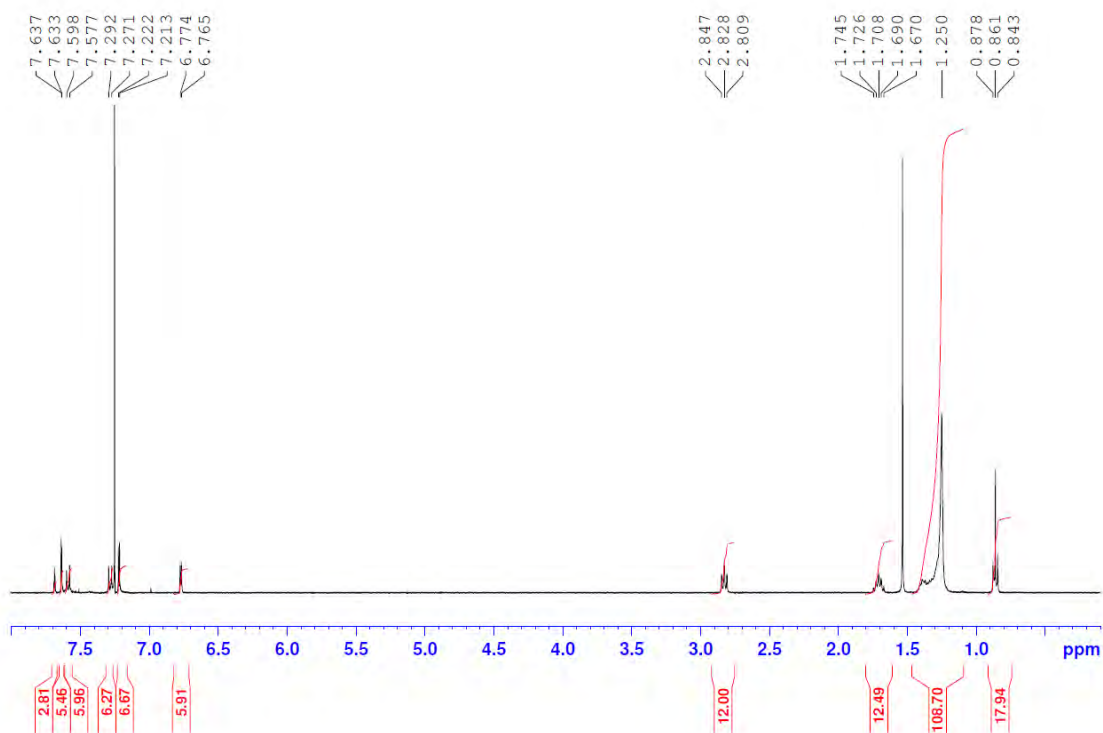

400mhz, Dendrimer 1

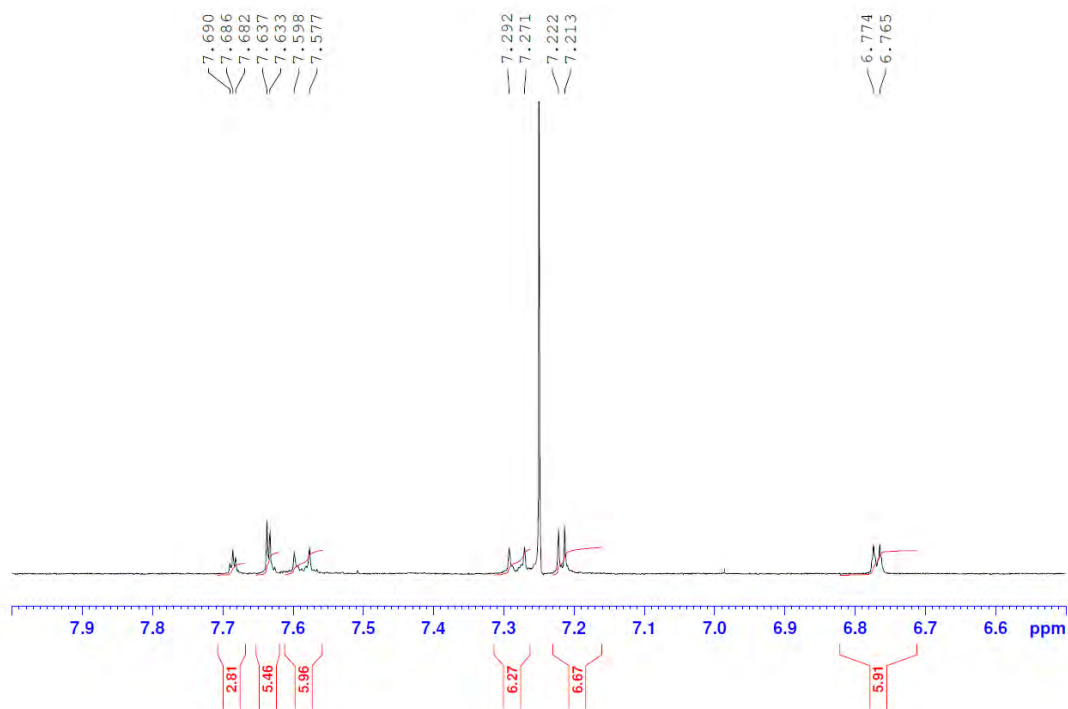

400mhz, Dendrimer 1

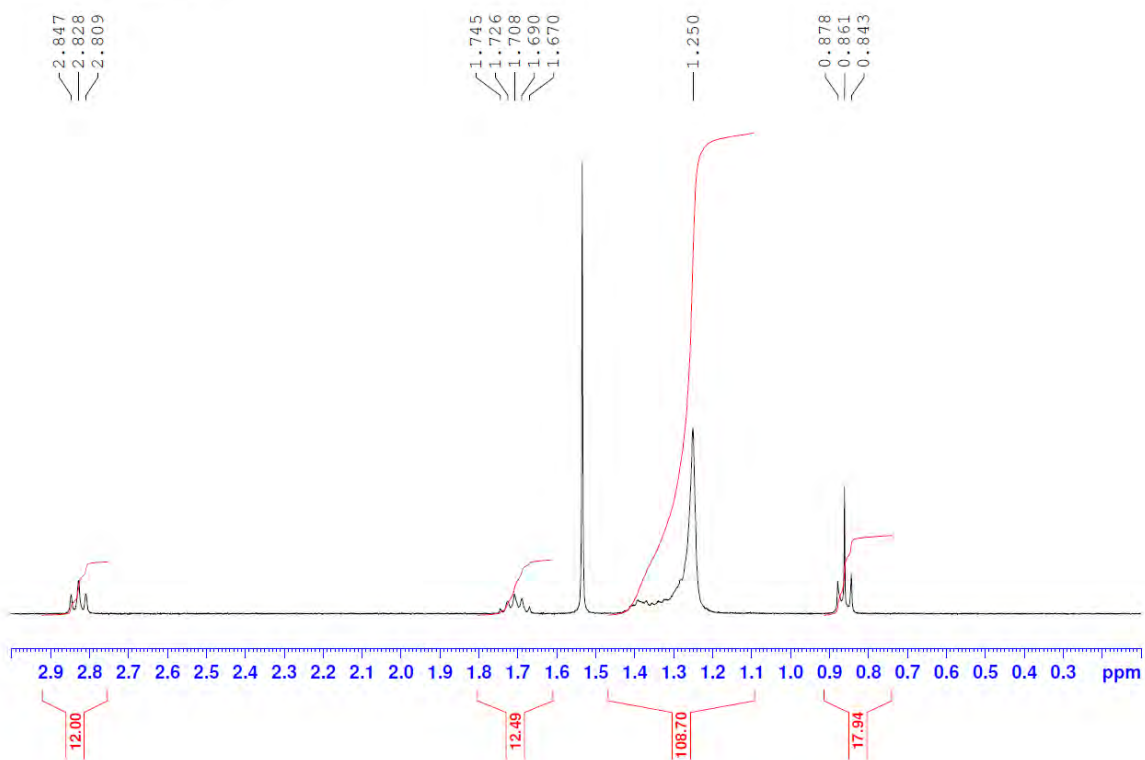

100 Mhz, Dendrimer 1

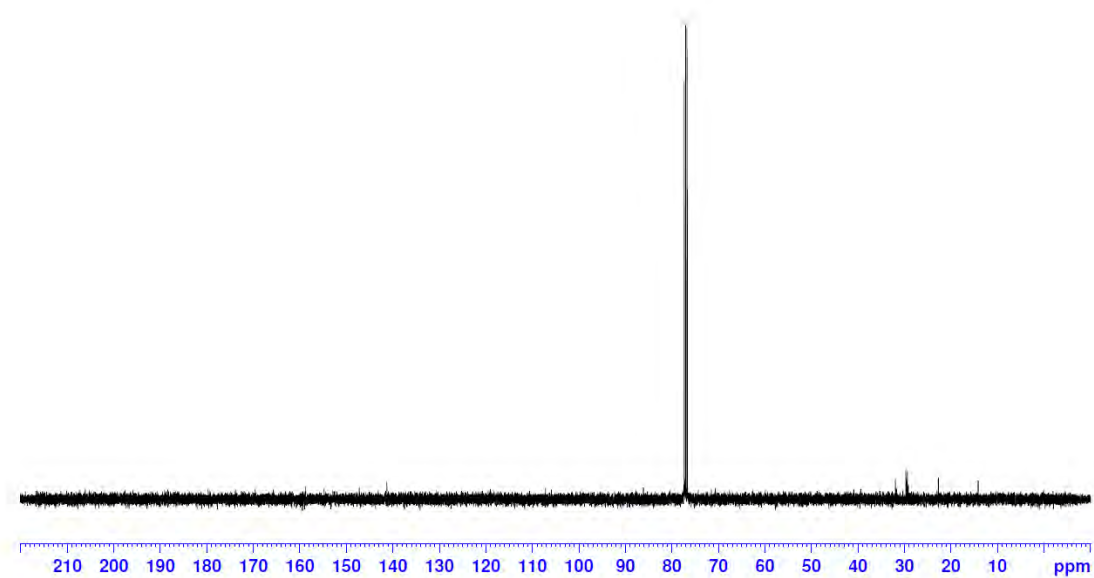

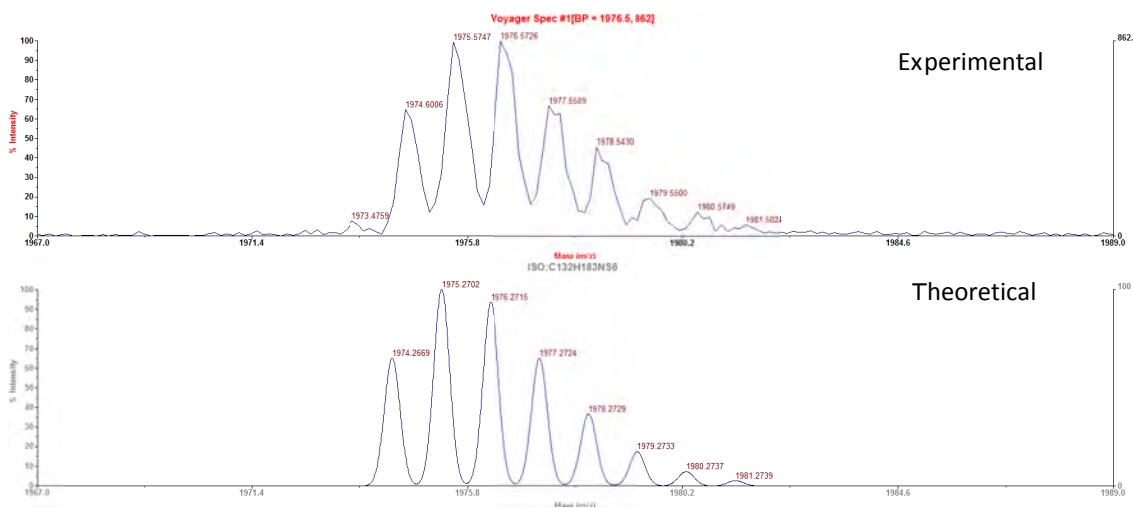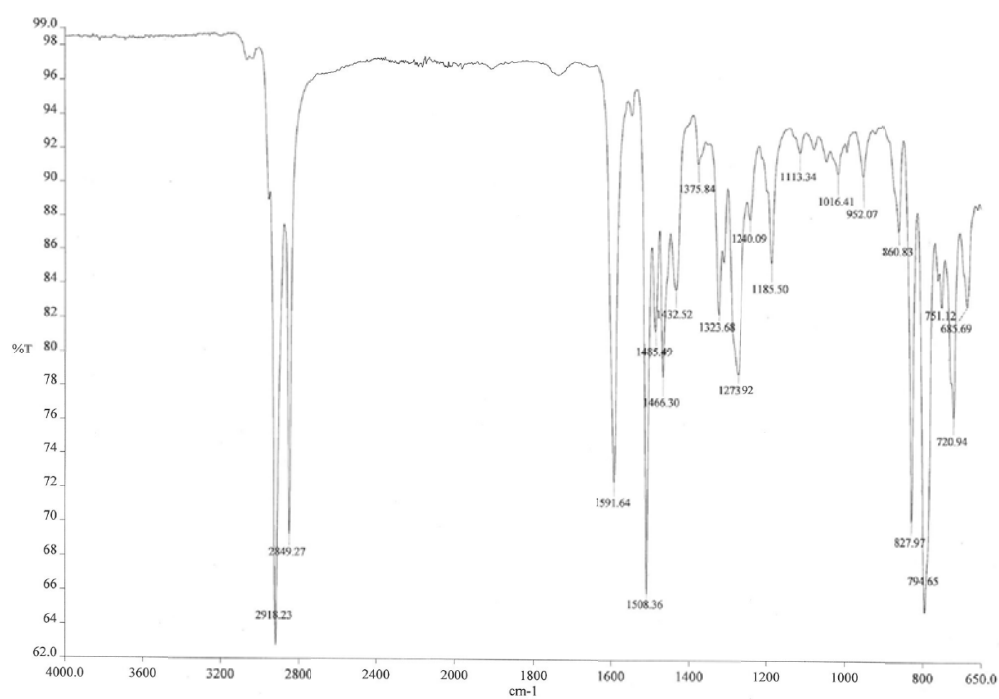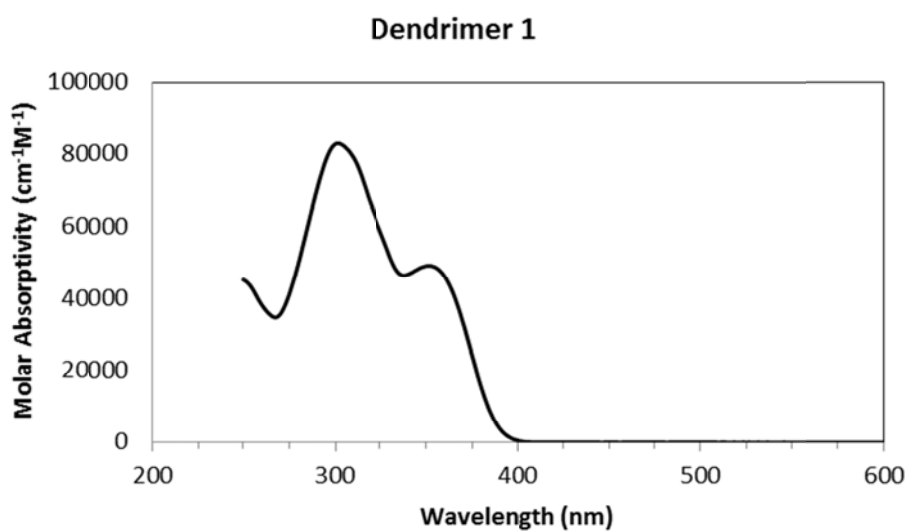

Dendrimer 2, 2

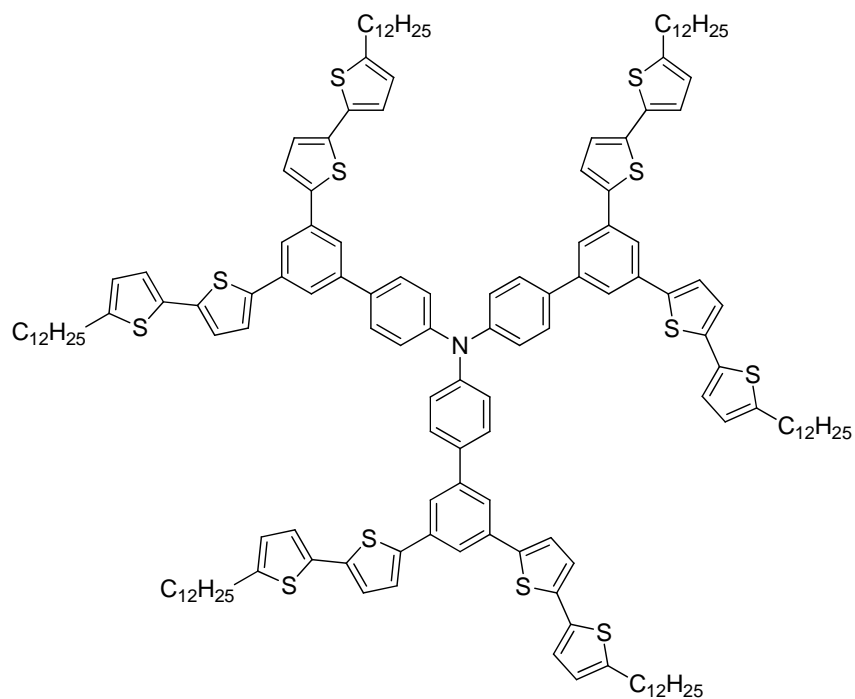

Chemical Formula: C<sub>156</sub>H<sub>195</sub>NS<sub>12</sub>

Molecular Weight: 2469.0

m/z: 2468.2 (100.0%), 2469.2 (89.7%), 2467.2 (83.4%), 2470.2 (66.5%), 2466.2 (46.1%), 2471.2 (42.3%), 2472.2 (23.7%), 2473.2 (11.9%), 2474.2 (5.4%), 2475.2 (2.2%)

Elemental Analysis: C, 75.89; H, 7.96; N, 0.57; S, 15.58

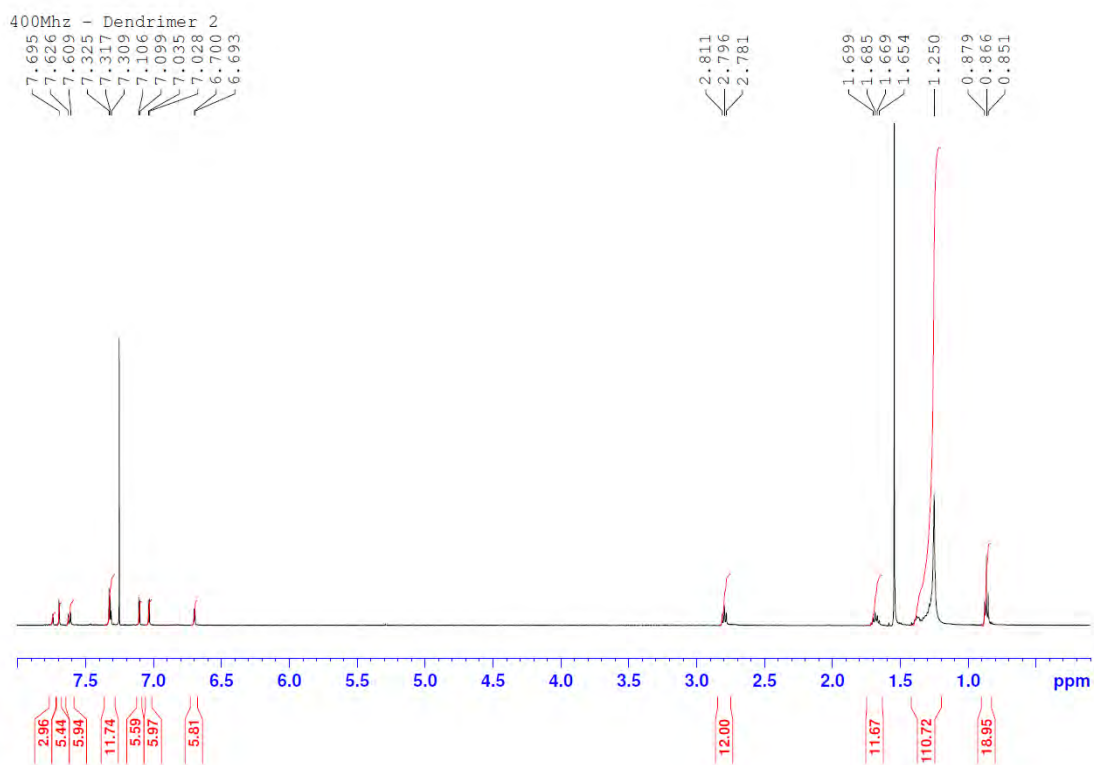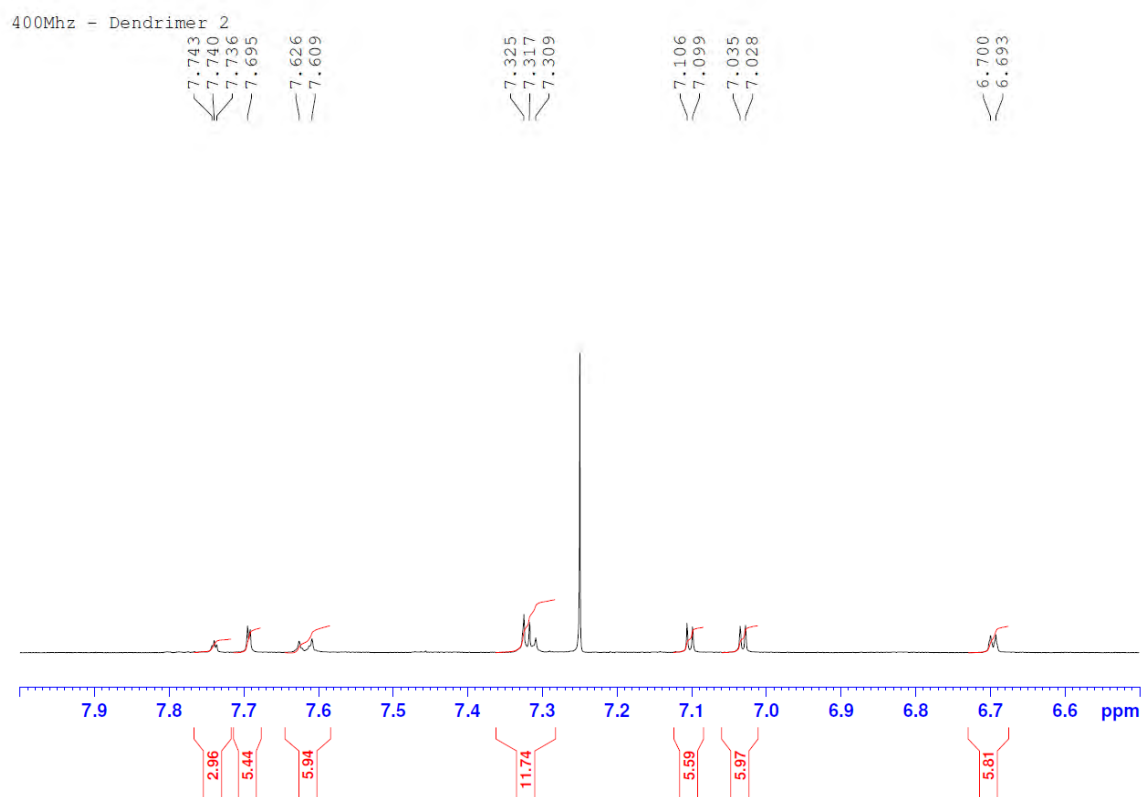

400Mhz - Dendrimer 2

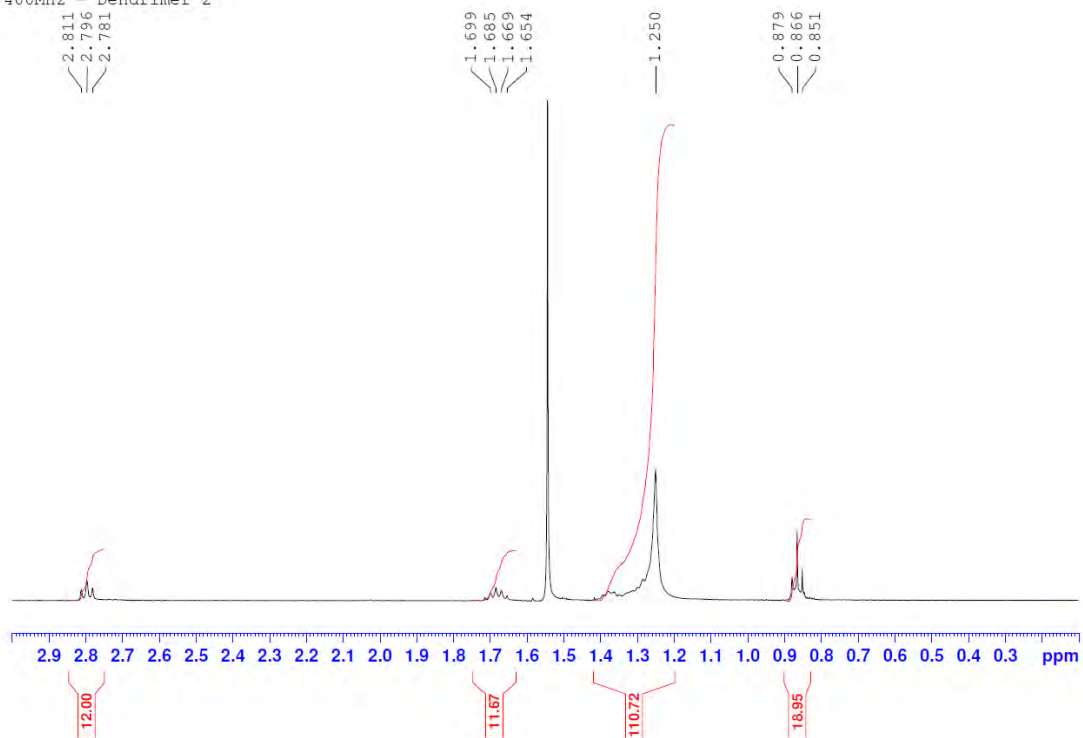

400 Mhz, Dendrimer 2

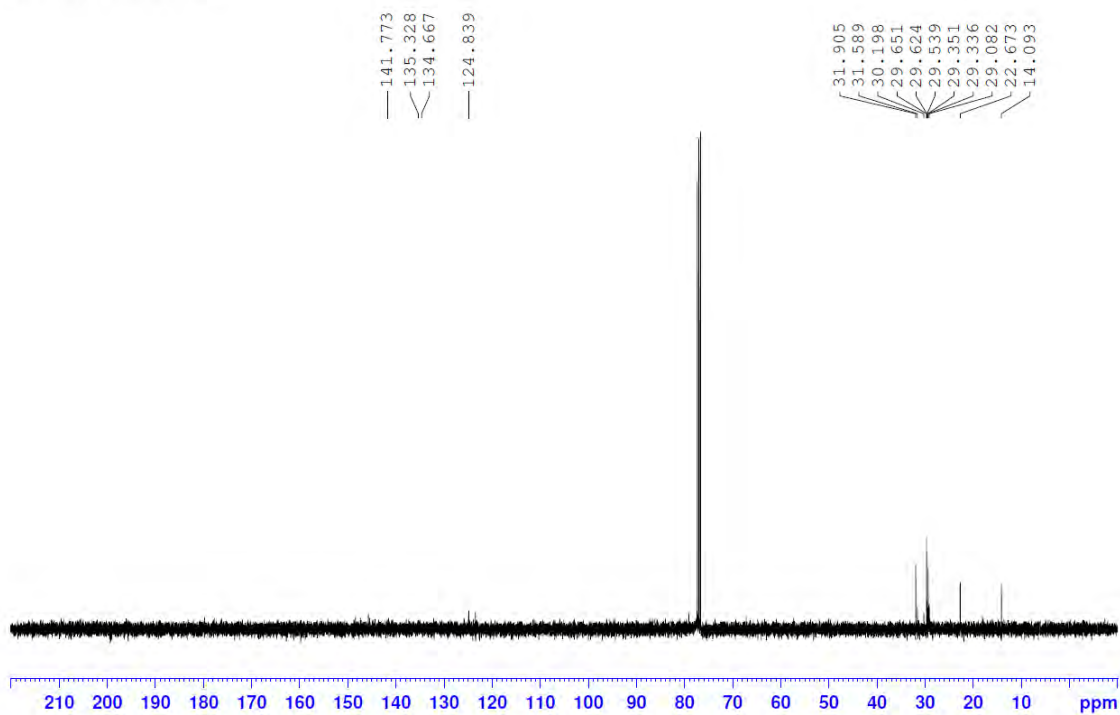



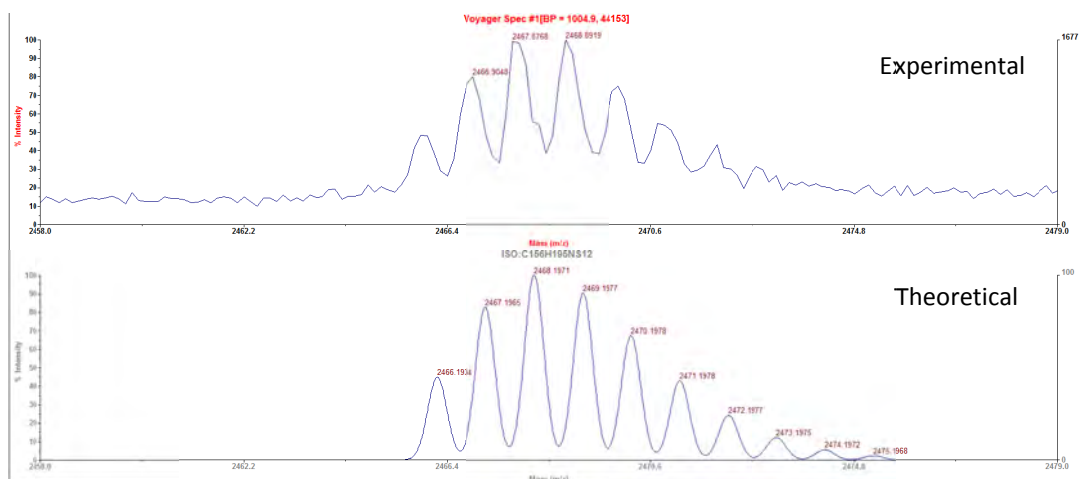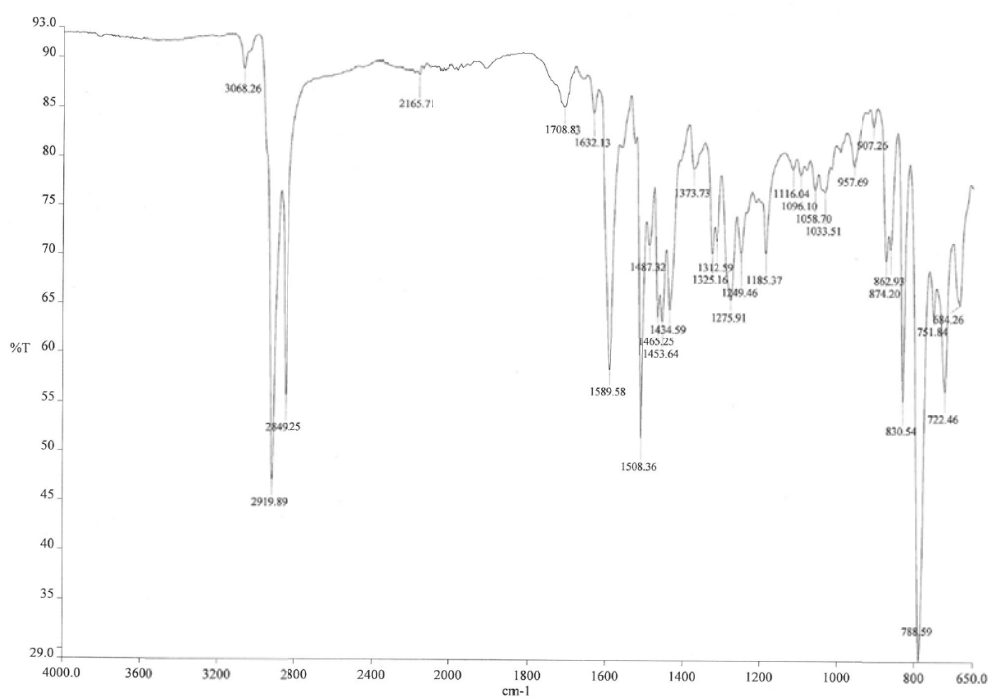

### Dendrimer 2

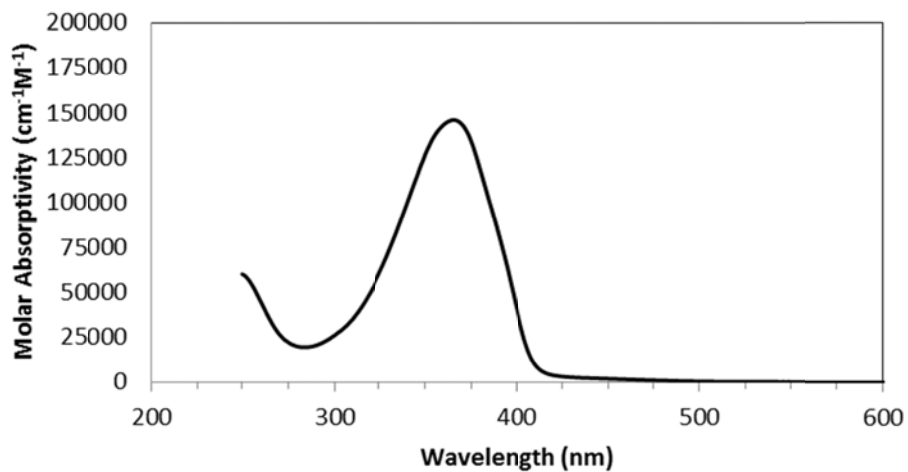

Tribiphenylamine, **7**

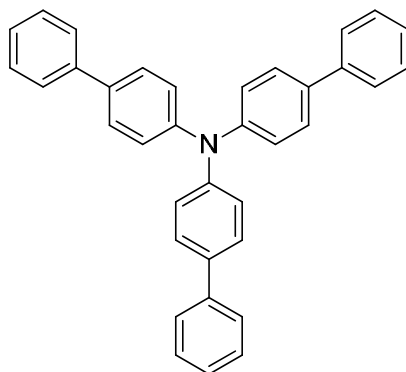

Chemical Formula:  $C_{36}H_{27}N$

Molecular Weight: 473.6

m/z: 473.2 (100.0%), 474.2 (39.6%), 475.2 (7.6%)

Elemental Analysis: C, 91.30; H, 5.75; N, 2.96

400 Mhz, tribiphenylamine

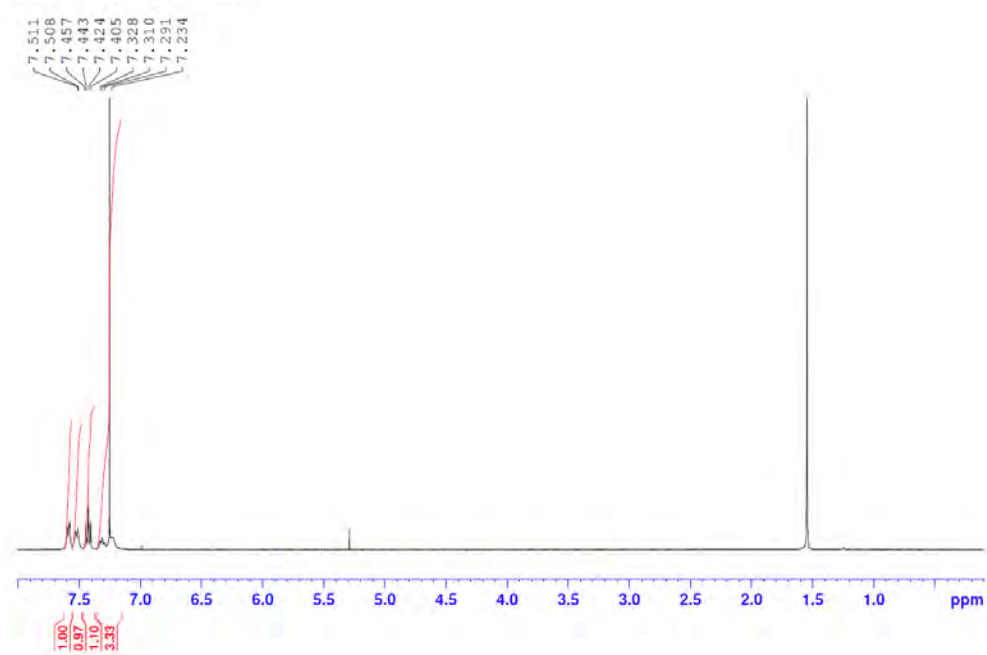

400 Mhz, tribiphenylamine

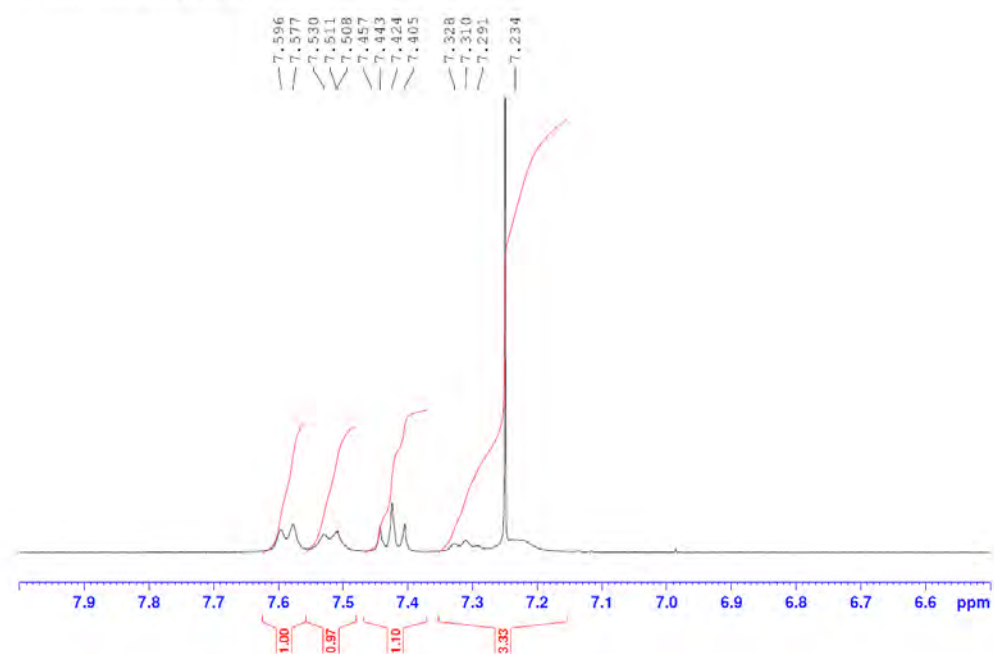

100 Mhz, tribiphenylamine

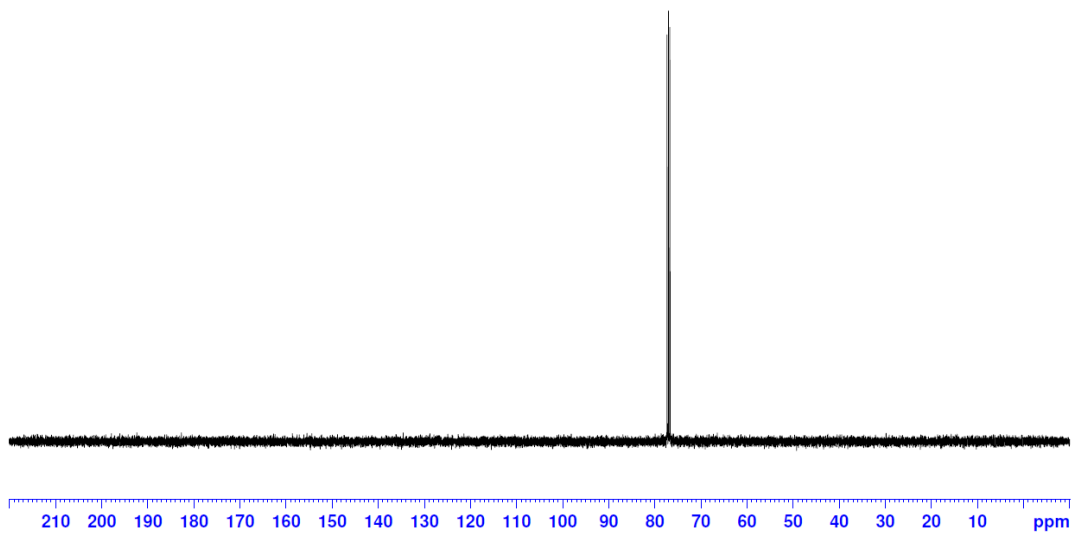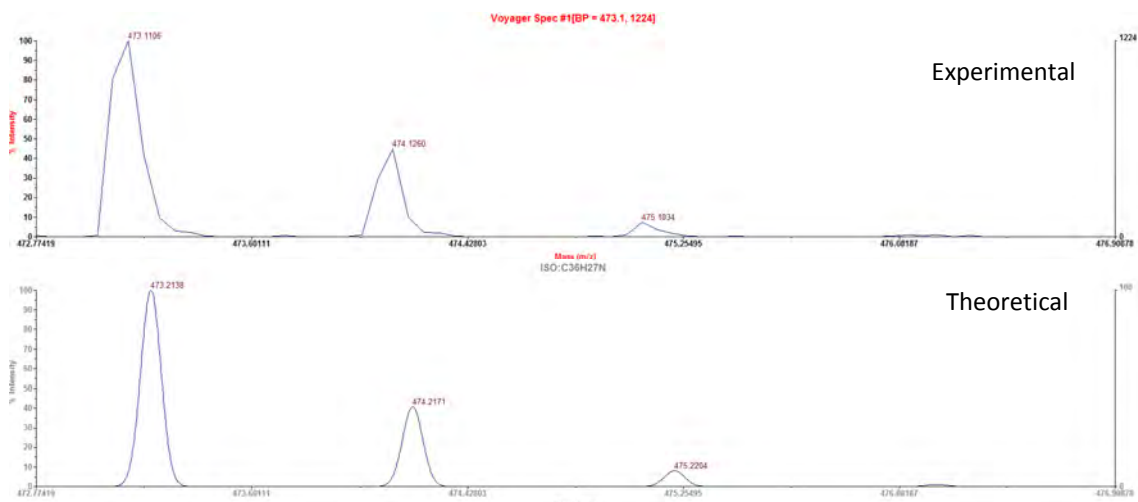

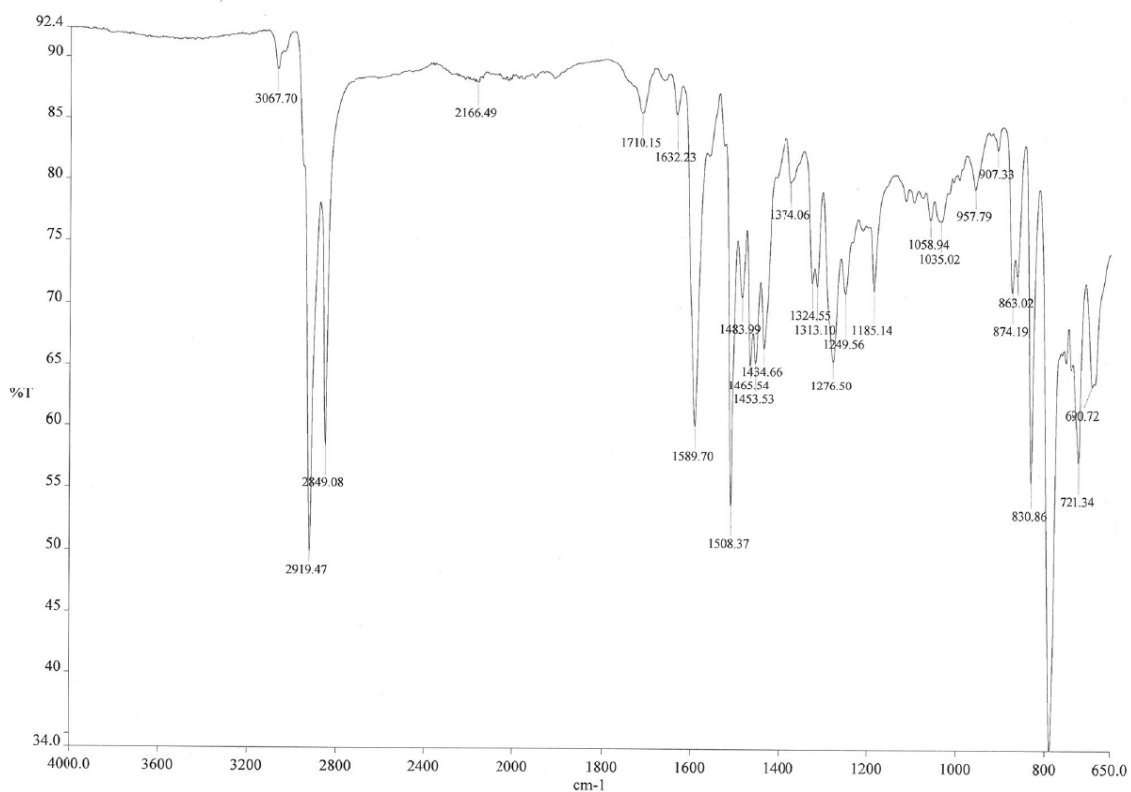

### Tribiphenylamine

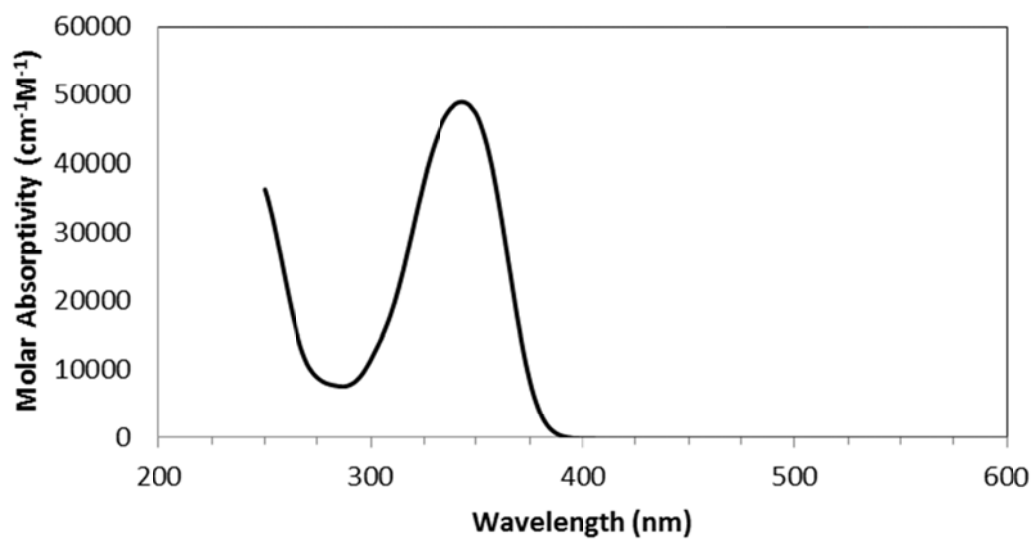

Supplement: c2tc00541g.pdf [file c2tc00541g.pdf]
